# Supplementary material
Source: MDPI journal article supplement (https://www.mdpi.com/2571-9408/7/1/24)
Supplement: s1 [file s1]

# QUESTIONNAIRE: GEOTOURISM INTERPRETATION CENTRE DESIGN

## CONSENT FOR DATA USE AND PUBLICATION

By participating in this questionnaire, you voluntarily provide information to be used for research purposes. Your responses will remain confidential and only be used on an aggregate and anonymous basis. Please read the following statement carefully and indicate your consent by continuing with the survey:

- a. *I understand that the information I provide in this survey will be used solely for research purposes and to collect data on "Sustainable Design of Geotourism Interpretation Centers." Improving the experience of the Santa Elena Peninsula Geopark/ Sustainable Design for Geotourism Interpretation Centers project. Enhancing the Santa Elena Peninsula Geopark Project Experience."*
- b. I acknowledge that my participation in this survey is completely voluntary, and I am not obligated to answer any question I do not wish to.
- c. I agree that my responses will be treated strictly confidential and only be reported in aggregate and anonymous form.
- d. I authorize the researchers to use and analyze my survey responses for research and scientific publication purposes.

## I) GENERAL INFORMATION OF THE PARTICIPANT

1. **AGE RANGE:**  
a) 15-20                      b) 21-26                      c) 27-32                      d) 33-38                      e) 38 or more
2. **SEX:**  
a) Female                      b) Male
3. **EDUCATION LEVEL:**  
a) School                      b) Higher Education                      c) College

## II) LIMITATIONS WITHIN THE TOURISM SECTOR

4. **Do you receive public/private sector financial support for the tourism incentive?**

|        |
|--------|
| a) Yes |
| b) No  |

5. **Select the media of tourism promotion used in the sector:**

|                    |
|--------------------|
| a) Brochures       |
| b) Newspapers      |
| c) Television      |
| d) Radio           |
| e) Social networks |
| f) Other           |
| g) Not carried out |

**6. What basic services does the sector have?**

|                       |
|-----------------------|
| a) Drinking water     |
| b) Electricity        |
| c) Sewer              |
| d) Internet           |
| e) Garbage collection |

**7. What access roads does the sector have?**

|                 |
|-----------------|
| a) Paved roads  |
| b) Dirt roads   |
| c) Gravel roads |

**8. What type of tourist aid elements does the place have?**

|                                |
|--------------------------------|
| d) Site identification signage |
| e) Tourism type signage        |
| f) Service area signage        |
| g) Walking trails              |

**III) ESTIMATED TOURISM STATISTICS BY SITE**

**9. Indicate the estimated number of people who visit the place per month:**

|  |
|--|
|  |
|--|

**10. Select how often people visit the location:**

|               |
|---------------|
| a) Daily      |
| b) Monthly    |
| c) Quarterly  |
| d) Semiannual |
| e) Yearly     |

**11. Select the time of year when people come to the place or the province in general:**

|             |
|-------------|
| a) Summer   |
| b) Winter   |
| c) Holidays |
| d) Others   |

**12. Indicate the reasons why you think people visit the place:**

|            |
|------------|
| a) Tourism |
| b) Work    |
| c) Other   |

**13. Indicate the profile of the people who come to the place:**

|                                           |
|-------------------------------------------|
| a) Academics, student groups, researchers |
| b) National tourist                       |
| c) International tourist                  |
| d) Businessmen, entrepreneurs             |

**14. Indicate the means of transportation used by people who visit the place:**

|            |
|------------|
| a) Own car |
| b) Taxi    |
| c) Bus     |
| d) Other   |

**15. Indicate the estimated stay of visitors in the sector:**

|                       |
|-----------------------|
| a) Only a few hours   |
| b) Whole day          |
| c) 2 to 3 days        |
| d) One week           |
| e) More than one week |

**16. Indicate the average daily expenses of a visitor, including food and lodging:**

|                         |
|-------------------------|
| a) Less than 25 dollars |
| b) 25-50 dollars        |
| c) More than 50 dollars |

**17. What do you think are the main interests of people who visit the area?**

|                     |
|---------------------|
| a) Beach            |
| b) Adventure        |
| c) Ecotourism       |
| d) Festivities      |
| e) Archeology       |
| f) History-Culture  |
| g) Gastronomy       |
| h) All of the above |
| i) Other            |

**18. Do you believe the Santa Elena province has tourist and historical attractions?**

|                                            |
|--------------------------------------------|
| a) Totally                                 |
| b) Probably                                |
| c) No                                      |
| d) Does not know, does not have an opinion |

**19. Indicate the tourist places in the province of Santa Elena that have a greater influx of people/tourists:**

|                                          |
|------------------------------------------|
| a) Montañita                             |
| b) La Chicolatera                        |
| c) Olon                                  |
| d) Manglaralto                           |
| e) Ayangue Beach                         |
| f) Los Amantes de Sumpa Museum           |
| g) San Vicente Hot Springs               |
| h) Megatherium Museum of UPSE University |
| i) All of the above                      |

#### IV) INTEREST CONCERNING THE CONSTRUCTION OF GEOTOURISM INTERPRETATION CENTRES

**20. Once the definition of geoheritage has been indicated, indicate from the list which geoheritage sites you recognize in the province of Santa Elena:**

|                                          |
|------------------------------------------|
| a) La Chocolatera                        |
| b) Oil zones                             |
| c) Manglaralto Coastal Aquifer           |
| d) San Vicente Hot Springs               |
| e) Megatherium Museum of UPSE University |
| f) Beaches                               |

**21. How important do you consider the Santa Elena Peninsula Geopark Project?**

|                      |
|----------------------|
| a) Very important    |
| b) Important         |
| c) Nothing important |

**22. How necessary do you consider the initiative of geotourism interpretation centres?:**

|                      |
|----------------------|
| a) Very necessary    |
| b) Necessary         |
| c) Nothing necessary |

**23. How would these Geotourism Information Centres contribute to tourism and local economic development?**
